# Supplementary material for: The efficiency of rare earth doped V 2 O 5 nanoparticles on photocatalytic and antibacterial activity
Source: Research Square preprint supplement (doi:10.21203/rs.3.rs-8760317/v1), 2026-02-16
Supplement: Supplementary file 1 [file a933ec81e58f59ff05f996ef.docx]

**Supporting Information**

**The efficiency of rare earth doped V2O5 nanoparticles on photocatalytic and antibacterial activity**

M.V. Arularasu a and K. Tharun Sidharth a

*a Sustainable Energy and Environment Research Unit, Department of Physiology, Saveetha Medical College and Hospital, Saveetha Institute of Medical and Technical Science, Chennai – 602 105, Tamil Nadu, India.*


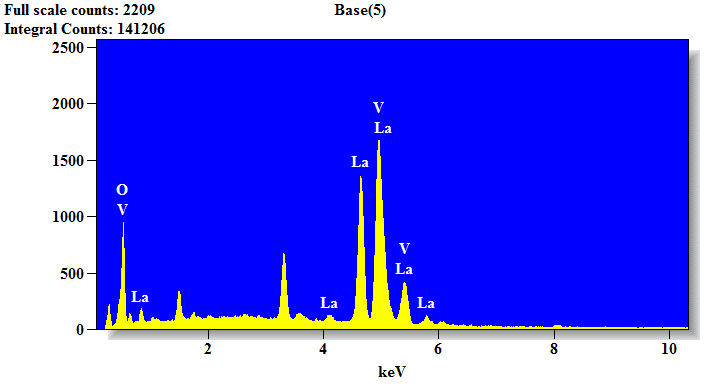


**Fig. S1**. EDX spectrum of La doped V2O5 nanoparticles

**Table. S1**. Energy spectrum of V2O5 and La doped V2O5 nanoparticles

| **Rank** | **Feature** | **Impact Level** |
| --- | --- | --- |
| 1 | hv_LaV2O5 | Very High |
| 2 | hv_V2O5 | High |
| 3 | alpha_V2O5 | Moderate |
| 4 | alpha_LaV2O5 | Moderate |

**Table.S2.** Prediction output table

| Wavelength_V₂O₅ | Abs_V₂O₅ | hv_V₂O₅ | alpha_V₂O₅ | Wavelength_La@V₂O₅ | Abs_Ln@V₂O₅ | hv_La@V₂O₅ | alpha_La@V₂O₅ | Predicted Bandgap |
| --- | --- | --- | --- | --- | --- | --- | --- | --- |
| 315.67 | 2.45 | 3.22 | 180.1 | 312.55 | 2.17 | 2.91 | 190.4 | 2.17 |
| 412.23 | 1.12 | 2.80 | 140.5 | 405.10 | 1.25 | 2.53 | 170.8 | 1.91 |


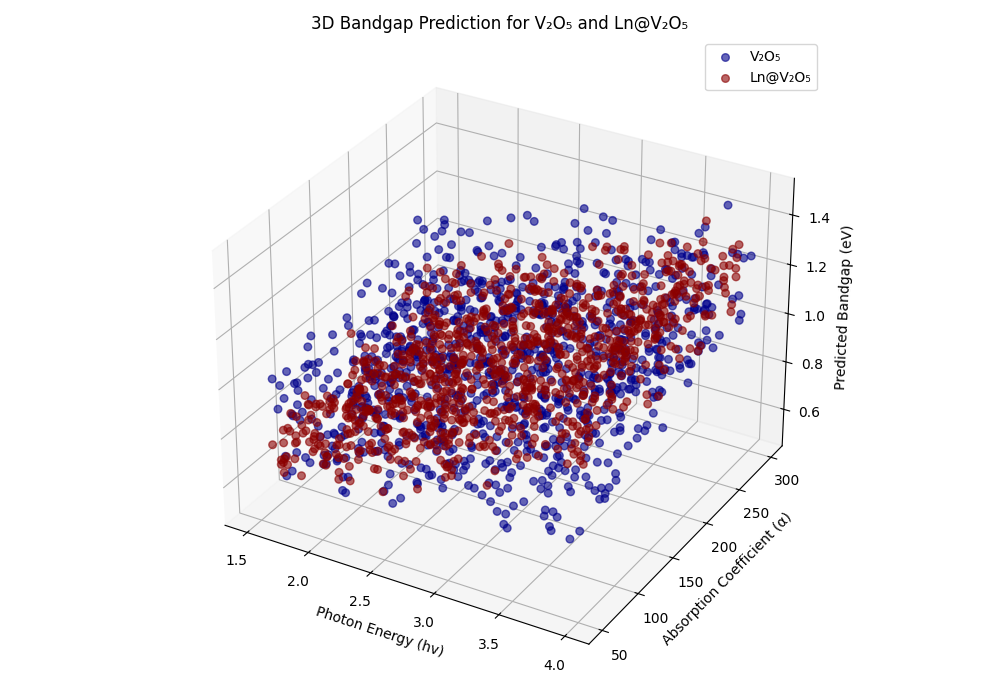


**Fig. S2.** Relationship between Photon energy (hv), absorption coefficient (α), and the predicted bandgap
